# Supplementary material for: A magnetic resonance (MR) microscopy system using a microfluidically cryo-cooled planar coil
Source: Royal Society of Chemistry journal article supplement (doi:10.1039/c1lc20056a), 2011-01-01
Supplement: c1lc20056a.pdf [file c1lc20056a.pdf]

# A Magnetic Resonance (MR) Microscopy System using a Microfluidically Cryo-Cooled Planar Coil

Chiwan Koo,<sup>a</sup> Richard F. Godley,<sup>b</sup> Jaewon Park,<sup>b</sup> Mary P. McDougall,<sup>a,b</sup> Steven M. Wright<sup>a,b</sup> and Arum Han<sup>\*a,b</sup>

5

<sup>a</sup> Department of Biomedical Engineering, Texas A&M University, College Station, TX, 77843 USA

<sup>b</sup> Department of Electrical & Computer Engineering, Texas A&M University, College Station, TX, 77843 USA

\*Email: arum.han@ece.tamu.edu

## 10 Supplementary Information

Instead of measuring the temperature gradient along the long axis of the coil, the coil substrate temperature (on the backside of the coil) was measured. In Table S1, the temperatures near the liquid nitrogen inlet and outlet region were initially different. After 10  
15 minutes of cryo-cooling, they converged and then reached below -190°C after 20 minutes. There was no temperature gradient along the coil axis.

Table S1. Temperature on the backside of the coil after cryo-cooling.

| Time (min) | Temperature near the inlet (°C) | Temperature near the outlet (°C) |
|------------|---------------------------------|----------------------------------|
| 0          | 21.9                            | 21.9                             |
| 5          | -111.1                          | -143                             |
| 10         | -181                            | -177.7                           |
| 15         | -191                            | -188                             |
| 20         | -192                            | -190                             |
| 25         | -191                            | -193.2                           |
| 30         | -192                            | -193                             |

20
